# Supplementary material
Source: Springer Nature journal article supplement (https://www.springermedizin.de/resource/supplementary/12913_2008_833_MOESM5_ESM.pdf/9535680)

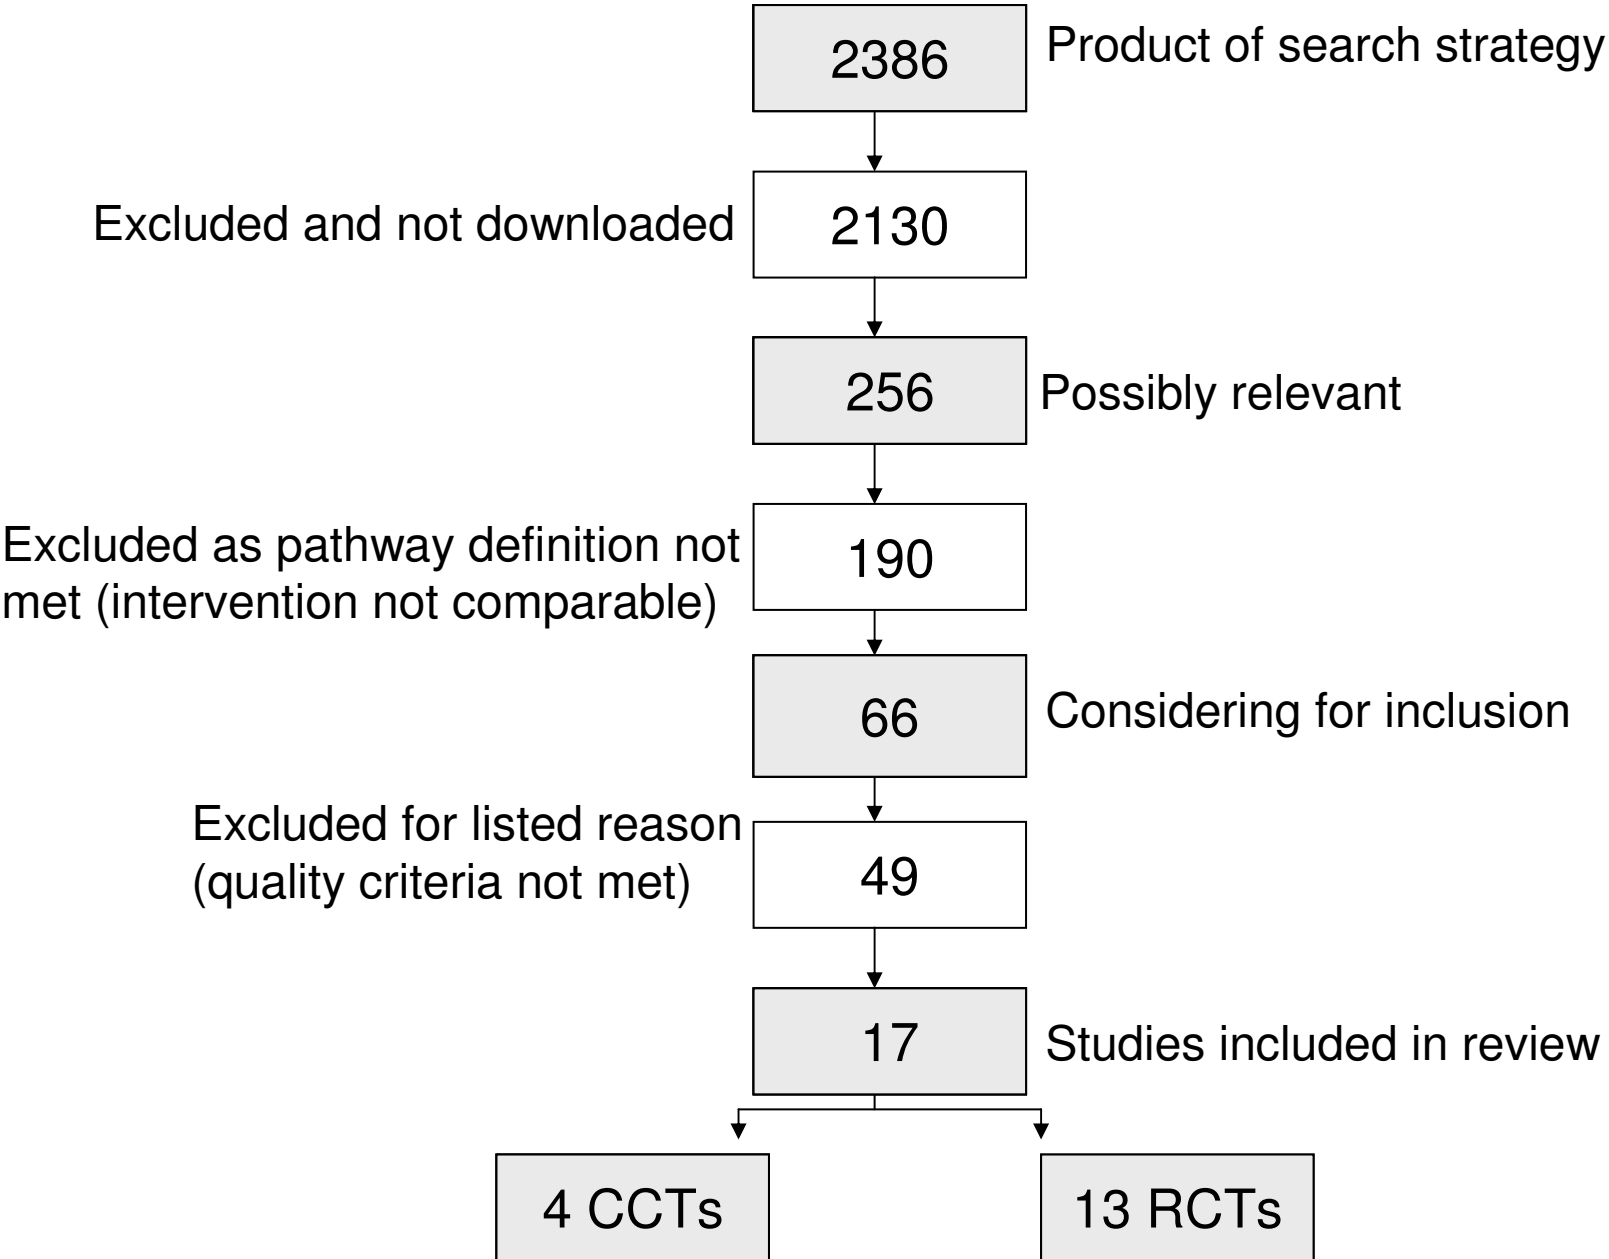

Supplement: MOESM5 [file 9535680]
